# Supplementary material for: An elusive electron shuttle from a facultative anaerobe
Source: eLife journal article supplement (doi:10.7554/elife.48054), 2019-06-24

**Notes**

|                |                                    |
|----------------|------------------------------------|
| Description    | Perform One-Way ANOVA              |
| User Name      | su2li                              |
| Operation Time | 2/22/2019 11:17:32                 |
| Report Status  | Report generated from Data Changed |
| Data Filter    | No                                 |

**Input Data**

|                   | Data                          | Range   |
|-------------------|-------------------------------|---------|
| MR-1              | [Book4]Sheet1!A"MR-1"         | [1*:3*] |
| $\Delta$ menC     | [Book4]Sheet1!B"menC::tn"     | [1*:3*] |
| MR-1+ACNQ         | [Book4]Sheet1!C"MR-1+ACNQ"    | [1*:3*] |
| $\Delta$ menC+ACN | [Book4]Sheet1!D"menC::tn+ACN" | [1*:3*] |

**Descriptive Statistics**

|             | N Analysis | N Missing | Mean     | Standard Deviation | SE of Mean |
|-------------|------------|-----------|----------|--------------------|------------|
| MR-1        | 3          | 0         | 1.38543  | 0.23027            | 0.13295    |
| menC::tn    | 3          | 0         | 1.14818  | 0.24799            | 0.14318    |
| MR-1+ACNQ   | 3          | 0         | 46.67687 | 3.35527            | 1.93717    |
| menC::tn+AC | 3          | 0         | 42.37444 | 4.83352            | 2.79063    |

**One Way ANOVA****Overall ANOVA**

|       | DF | Sum of Squares | Mean Square | F Value   | Prob>F     |
|-------|----|----------------|-------------|-----------|------------|
| Model | 3  | 5641.83491     | 1880.61164  | 216.56535 | 5.36088E-8 |
| Error | 8  | 69.47045       | 8.68381     |           |            |
| Total | 11 | 5711.30536     |             |           |            |

Null Hypothesis: The means of all levels are equal.

Alternative Hypothesis: The means of one or more levels are different.

At the 0.001 level, the population means are significantly different.

**Fit Statistics**

|  | R-Square | Coeff Var | Root MSE | Data Mean |
|--|----------|-----------|----------|-----------|
|  | 0.98784  | 0.1287    | 2.94683  | 22.89623  |

**Means Comparisons****Tukey Test**

|                                  | MeanDiff | SEM     | q Value  | Prob       | Alpha | Sig | LCL       | UCL      |
|----------------------------------|----------|---------|----------|------------|-------|-----|-----------|----------|
| $\Delta$ menC MR-1               | -0.23725 | 2.40608 | 0.13945  | 0.99963    | 0.001 | 0   | -15.5107  | 15.0362  |
| MR-1+ACNQ MR-1                   | 45.29144 | 2.40608 | 26.62083 | 1.84137E-7 | 0.001 | 1   | 30.01799  | 60.56489 |
| MR-1+ACNQ $\Delta$ menC          | 45.52869 | 2.40608 | 26.76028 | 1.71633E-7 | 0.001 | 1   | 30.25524  | 60.80214 |
| $\Delta$ menC+ACNQ MR-1          | 40.98901 | 2.40608 | 24.092   | 5.34533E-7 | 0.001 | 1   | 25.71556  | 56.26246 |
| $\Delta$ menC+ACNQ $\Delta$ menC | 41.22626 | 2.40608 | 24.23145 | 5.05081E-7 | 0.001 | 1   | 25.95281  | 56.49971 |
| $\Delta$ menC+ACNQ MR-1+A        | -4.30243 | 2.40608 | 2.52883  | 0.34463    | 0.001 | 0   | -19.57588 | 10.97102 |

Sig equals 1 indicates that the difference of the means is significant at the 0.001 level.

Sig equals 0 indicates that the difference of the means is not significant at the 0.001 level.

**Homogeneity of Variance Test****Levene's Test(Absolute Deviations)**

|       | DF | Sum of Squares | Mean Square | F Value | Prob>F  |
|-------|----|----------------|-------------|---------|---------|
| Model | 3  | 26.82522       | 8.94174     | 6.22707 | 0.01733 |
| Error | 8  | 11.48758       | 1.43595     |         |         |

At the 0.001 level, the population variances are not significantly different.

**Powers**

|              | Alpha | Sample Size | Power |
|--------------|-------|-------------|-------|
| Actual Power | 0.001 | 12          | 1     |

**Box Charts**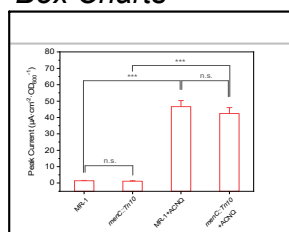

Supplement: supp [file elife-48054-supp-v1.zip › elife_poa_e48054_Supplementary_file_2.pdf]
