# Supplementary material for: An elusive electron shuttle from a facultative anaerobe
Source: eLife journal article supplement (doi:10.7554/elife.48054), 2019-06-24
Supplement: supp [file elife-48054-supp-v1.zip]

Archive with 26 entries (26 files):
- elife_poa_e48054_Figure_2_figure_Supplement_5.jpg
- elife_poa_e48054_Figure_3_figure_Supplement_2.png
- elife_poa_e48054_Figure_3_figure_Supplement_3.png
- elife_poa_e48054_Figure_2_figure_Supplement_8.jpg
- elife_poa_e48054_Figure_3_figure_Supplement_1.jpg
- elife_poa_e48054_Figure_1_figure_Supplement_4.jpg
- elife_poa_e48054_Supplementary_file_1.docx
- elife_poa_e48054_Transparent_Reporting_File.pdf
- elife_poa_e48054_Figure_2_figure_Supplement_15.jpg
- elife_poa_e48054_Figure_2_figure_Supplement_1.png
- elife_poa_e48054_Figure_1_figure_supplement_2.jpg
- elife_poa_e48054_Figure_2_figure_Supplement_3.jpg
- elife_poa_e48054_Figure_2_figure_Supplement_2.jpg
- elife_poa_e48054_Supplementary_file_2.pdf
- elife_poa_e48054_Figure_1_figure_Supplement_3.jpg
- elife_poa_e48054_Figure_2_figure_Supplement_12.jpg
- elife_poa_e48054_Figure_1_figure_supplement_1.jpg
- elife_poa_e48054_Figure_3_source_data_1.xlsx
- elife_poa_e48054_Figure_2_figure_Supplement_13.jpg
- elife_poa_e48054_Figure_2_figure_Supplement_14.jpg
- elife_poa_e48054_Figure_2_figure_Supplement_9.jpg
- elife_poa_e48054_Figure_2_figure_Supplement_7.jpg
- elife_poa_e48054_Figure_2_figure_Supplement_10.jpg
- elife_poa_e48054_Figure_2_figure_Supplement_11.jpg
- elife_poa_e48054_Figure_2_figure_Supplement_4.jpg
- elife_poa_e48054_Figure_2_figure_Supplement_6.jpg
