# Supplementary material for: An elusive electron shuttle from a facultative anaerobe
Source: eLife journal article supplement (doi:10.7554/elife.48054), 2019-06-24
Supplement: supp [file elife-48054-supp-v1.zip › elife_poa_e48054_Figure_3_source_data_1.xlsx]

## Sheet: Sheet1
Source Data for Figure 3C
Sample name	Peak current (mA/OD600)			electrode surface area (cm^2)	Peak current density (μA·cm^2·OD600^-1)			Mean	Standard Deviation	SE of Mean
menC::Tn10	0.0152313	0.0229192	0.0172377	16.08	0.947223	1.42532	1.072	1.14818	0.24799	0.14318
menC::Tn10 +ACNQ	0.593263	0.740178	0.710702		36.8944	46.031	44.1979	42.3744	4.83352	2.79063
MR-1	0.0195833	0.0265	0.02075		1.21787	1.64801	1.29042	1.38543	0.23027	0.13295
MR-1+ACNQ	0.703077	0.739385	0.809231		43.7237	45.9816	50.3253	46.6769	3.35527	1.93717
