# Supplementary material for: An elusive electron shuttle from a facultative anaerobe
Source: eLife journal article supplement (doi:10.7554/elife.48054), 2019-06-24
Supplement: supp [file elife-48054-supp-v1.zip › elife_poa_e48054_Supplementary_file_1.docx]

**Supporting Information**

**An Elusive Electron Shuttle from a Facultative Anaerobe**

Emily Mevers1†, Lin Su2,3†, Gleb Pischany1,4, Moshe Baruch2, Jose Cornejo2, Elissa Hobert1, Eric Demise1, Caroline M. Ajo-Franklin2,5*, & Jon Clardy1*

Departments of 1Biological Chemistry and Molecular Pharmacology, and 4Microbiology and Immunobiology, Harvard Medical School, Boston, MA 02115, USA

2Molecular Foundry Division, and 5Molecular Biophysics and Integrated Bioimaging Division, Lawrence Berkeley National Laboratory, University of California, Berkeley, CA 94720, USA

3State Key Laboratory of Bioelectronics, School of Biological Science and Medical Engineering, Southeast University, Nanjing, 210018, China

†These authors contributed equally to this work

**Table of Contents:**

Table S1:Acquisition of non-*E. coli* bacterial strains…………………………………………..………………………...pg. 2

Table 2:*E. coli* strains purchased from Coli Genetic Stock Center………………………………..……………….pg. 2

References………………………………………………………………………………………………………………………………......pg. 3

| **Table S1.** Acquisition of non-*E. coli* CGCS bacterial strains | | | |
| --- | --- | --- | --- |
| **Strain** | **Acquired from** | **Commercial ID** |
| *S. oneidensis* MR-1 | Kolter lab [(Newman and Kolter, 2000)](https://paperpile.com/c/4tWkDK/5PPr) | **n/a** |
| *S. oneidensis* *menC::Tn10* | Kolter lab [(Newman and Kolter, 2000)](https://paperpile.com/c/4tWkDK/5PPr) | **n/a** |
| *S. oneidensis menA::Himar* | Barstow lab [(Baym et al., 2016)](https://paperpile.com/c/4tWkDK/g5A9) | **n/a** |
| *V. cholerae* V52 | Kolter lab | **n/a** |
| *B. fragilis* | ATCC | 25285 |
| *L. lactis lactis* | DSM | 20481 |
| *S. oneidensis* Δ*bfe* | Gralnick lab [(Kotloski and Gralnick, 2013)](https://paperpile.com/c/4tWkDK/KhY8l) | **n/a** |
| *S. oneidensis* Δ*mtr* | Gralnick lab [(Coursolle and Gralnick, 2012)](https://paperpile.com/c/4tWkDK/kwnw) | **n/a** |

| **Table S2.** *E. coli* strains purchased from Coli Genetic Stock Center | | | |
| --- | --- | --- | --- |
| **Strain** | **Name** | **CGSC#** | **Genotype** |
| Parent | BW25113 | 7636 | F-, *Δ(araD-araB)567*, *ΔlacZ4787*(::rrnB-3), *λ-*, *rph-1*, *Δ(rhaD-rhaB)568*, *hsdR514* |
| *ΔaspC* | JW0911-1 | 8924 | F-, Δ(araD-araB)567, ΔlacZ4787(::rrnB-3), λ-, ΔaspC745::kan, rph-1, Δ(rhaD-rhaB)568, hsdR514 |
| *ΔtyrB* | JW4014-2 | 10886 | F-, Δ(araD-araB)567, ΔlacZ4787(::rrnB-3), λ-, rph-1, Δ(rhaD-rhaB)568, ΔtyrB747::kan, hsdR514 |
| *ΔargD* | JW3322-1 | 10482 | F-, Δ(araD-araB)567, ΔlacZ4787(::rrnB-3), λ-, ΔargD767::kan, rph-1, Δ(rhaD-rhaB)568, hsdR514 |
| *ΔgabT* | JW2637-4 | 11775 | F-, Δ(araD-araB)567, ΔlacZ4787(::rrnB-3), λ-, ΔgabT743::kan, rph-1, Δ(rhaD-rhaB)568, hsdR514 |
| *ΔserC* | JW0890-1 | 8913 | F-, Δ(araD-araB)567, ΔlacZ4787(::rrnB-3), λ-, ΔserC731::kan, rph-1, Δ(rhaD-rhaB)568, hsdR514 |
| *ΔilvE* | JW5606-1 | 11592 | F-, Δ(araD-araB)567, ΔlacZ4787(::rrnB-3), λ-, rph-1, ΔilvE721::kan, Δ(rhaD-rhaB)568, hsdR514 |
| *ΔguaA* | JW2491-1 | 11876 | F-, Δ(araD-araB)567, ΔlacZ4787(::rrnB-3), λ-, ΔguaA756::kan, rph-1, Δ(rhaD-rhaB)568, hsdR514 |
| *ΔavtA* | JW5652-1 | 11634 | F-, Δ(araD-araB)567, ΔlacZ4787(::rrnB-3), λ-, ΔavtA755::kan, rph-1, Δ(rhaD-rhaB)568, hsdR514 |
| *ΔarnB* | JW5372-1 | 11347 | F-, Δ(araD-araB)567, ΔlacZ4787(::rrnB-3), λ-, ΔarnB734::kan, rph-1, Δ(rhaD-rhaB)568, hsdR514 |
| *ΔhisC* | JW2003-1 | 9649 | F-, Δ(araD-araB)567, ΔlacZ4787(::rrnB-3), λ-, ΔhisC790::kan, rph-1, Δ(rhaD-rhaB)568, hsdR514 |
| *ΔybdL* | JW0593-3 | 8709 | F-, Δ(araD-araB)567, ΔlacZ4787(::rrnB-3), ΔybdL739::kan, λ-, rph-1, Δ(rhaD-rhaB)568, hsdR514 |
| *ΔpuuE* | JW1295-1 | 11635 | F-, Δ(araD-araB)567, ΔlacZ4787(::rrnB-3), λ-, ΔpuuE738::kan, rph-1, Δ(rhaD-rhaB)568, hsdR514 |
| *ΔyjiR* | JW4303-1 | 11079 | F-, Δ(araD-araB)567, ΔlacZ4787(::rrnB-3), λ-, rph-1, Δ(rhaD-rhaB)568, ΔyjiR739::kan, hsdR514 |
| *ΔydcR* | JW1434-1 | 9254 | F-, Δ(araD-araB)567, ΔlacZ4787(::rrnB-3), λ-, ΔydcR730::kan, rph-1, Δ(rhaD-rhaB)568, hsdR514 |
| *ΔyhfS* | JW3339-1 | 10494 | F-, Δ(araD-araB)567, ΔlacZ4787(::rrnB-3), λ-, ΔyhfS783::kan, rph-1, Δ(rhaD-rhaB)568, hsdR514 |
| *ΔastC* | JW1737-4 | 11761 | F-, Δ(araD-araB)567, ΔlacZ4787(::rrnB-3), λ-, ΔastC746::kan, rph-1, Δ(rhaD-rhaB)568, hsdR514 |
| *ΔpatA* | JW5510-1 | 11435 | F-, Δ(araD-araB)567, ΔlacZ4787(::rrnB-3), λ-, ΔygjG763::kan, rph-1, Δ(rhaD-rhaB)568, hsdR514 |
| *ΔyfdZ* | JW2376-1 | 9898 | F-, Δ(araD-araB)567, ΔlacZ4787(::rrnB-3), λ-, ΔyfdZ788::kan, rph-1, Δ(rhaD-rhaB)568, hsdR514 |
| *ΔyfbQ* | JW2287-1 | 9839 | F-, Δ(araD-araB)567, ΔlacZ4787(::rrnB-3), λ-, ΔyfbQ772::kan, rph-1, Δ(rhaD-rhaB)568, hsdR514 |
| *ΔglmS* | E111 | 5393 | F-, Δ(gpt-proA)62, lacY1, tsx-33, galE28(GalS), λ-, rpsL31(strR), kdgK51, xylA5, mtl-1, glmS1, argE3(Oc), thiE1 |
| *ΔhemL* | GE1376 | 7264 | Hfr(PO12), thr-1, leuB6(Am), panD2, hemL206, lacZ4, glnX44(AS), λ-, rfbC1, rpsL8, thiE1 |
| *ΔbioA* | JW0757-1 | 8816 | F-, Δ(araD-araB)567, ΔlacZ4787(::rrnB-3), λ-, ΔbioA746::kan, rph-1, Δ(rhaD-rhaB)568, hsdR514 |
| *ΔmenA* | JW3901-1 | 10816 | F-, Δ(araD-araB)567, ΔlacZ4787(::rrnB-3), λ-, rph-1, Δ(rhaD-rhaB)568, ΔmenA789::kan, hsdR514 |
| *ΔmenC* | JW2256-1 | 9819 | F-, Δ(araD-araB)567, ΔlacZ4787(::rrnB-3), λ-, ΔmenC743::kan, rph-1, Δ(rhaD-rhaB)568, hsdR514 |
| *ΔmenB* | JW2257-2 | 11787 | F-, Δ(araD-araB)567, ΔlacZ4787(::rrnB-3), λ-, ΔmenB744::kan, rph-1, Δ(rhaD-rhaB)568, hsdR514 |

References

[Baym M, Shaket L, Anzai IA, Adesina O, Barstow B. 2016. Rapid construction of a whole-genome transposon insertion collection for Shewanella oneidensis by Knockout Sudoku. *Nature Communications*. doi:](http://paperpile.com/b/4tWkDK/g5A9)[10.1038/ncomms13270](http://dx.doi.org/10.1038/ncomms13270)

[Coursolle D, Gralnick JA. 2012. Reconstruction of Extracellular Respiratory Pathways for Iron(III) Reduction in Shewanella Oneidensis Strain MR-1. *Frontiers in Microbiology*. doi:](http://paperpile.com/b/4tWkDK/kwnw)[10.3389/fmicb.2012.00056](http://dx.doi.org/10.3389/fmicb.2012.00056)

[Kotloski NJ, Gralnick JA. 2013. Flavin electron shuttles dominate extracellular electron transfer by Shewanella oneidensis, mBio, 4, e00553--12; doi: 10.1128/mBio. 00553-12. *Chapter 1: General introduction & Objectives*.](http://paperpile.com/b/4tWkDK/KhY8l)

[Newman DK, Kolter R. 2000. A role for excreted quinones in extracellular electron transfer. *Nature* **405**:94–97.](http://paperpile.com/b/4tWkDK/5PPr)
