# Supplementary figures and images for: An elusive electron shuttle from a facultative anaerobe
Source: eLife journal article supplement (doi:10.7554/elife.48054), 2019-06-24

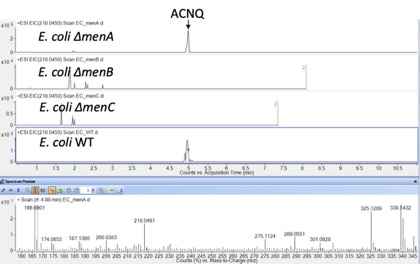

Supplement: supp [file elife-48054-supp-v1.zip › elife_poa_e48054_Figure_2_figure_Supplement_5.jpg]

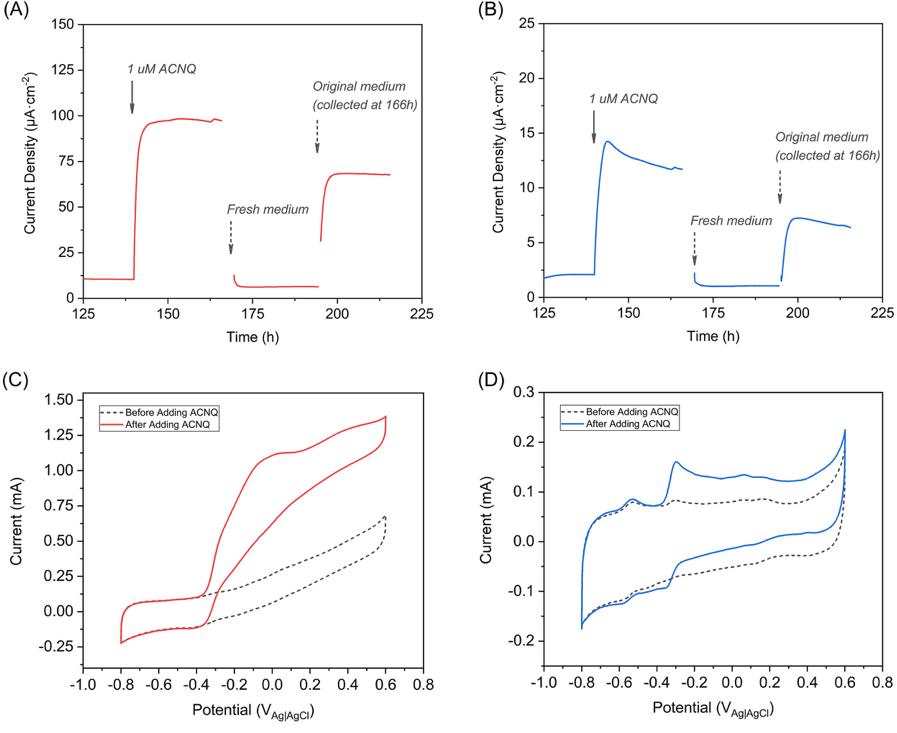

Supplement: supp [file elife-48054-supp-v1.zip › elife_poa_e48054_Figure_3_figure_Supplement_2.png]

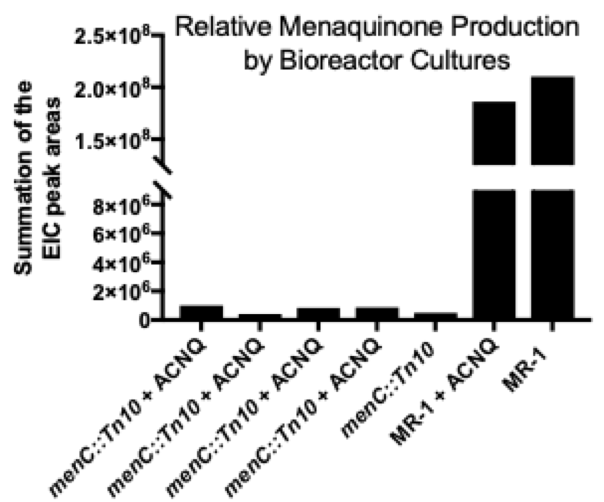

Supplement: supp [file elife-48054-supp-v1.zip › elife_poa_e48054_Figure_3_figure_Supplement_3.png]

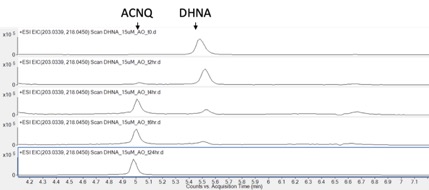

Supplement: supp [file elife-48054-supp-v1.zip › elife_poa_e48054_Figure_2_figure_Supplement_8.jpg]

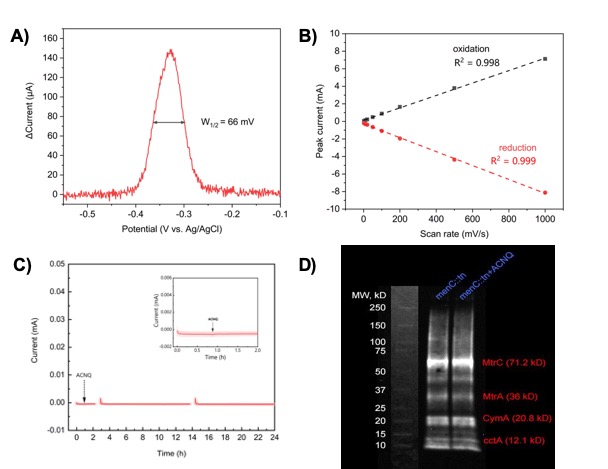

Supplement: supp [file elife-48054-supp-v1.zip › elife_poa_e48054_Figure_3_figure_Supplement_1.jpg]

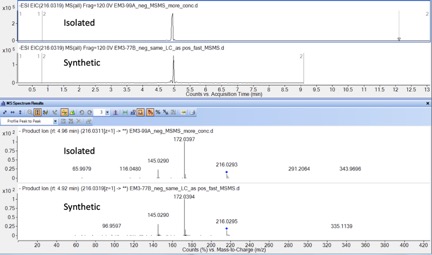

Supplement: supp [file elife-48054-supp-v1.zip › elife_poa_e48054_Figure_1_figure_Supplement_4.jpg]

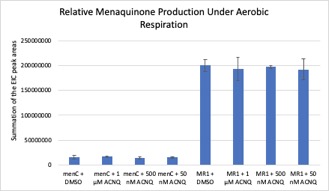

Supplement: supp [file elife-48054-supp-v1.zip › elife_poa_e48054_Figure_2_figure_Supplement_15.jpg]

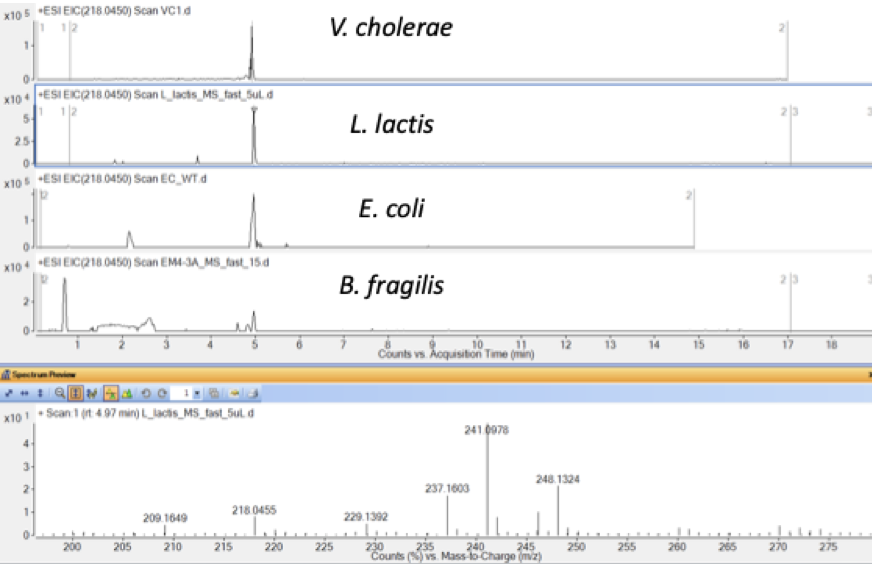

Supplement: supp [file elife-48054-supp-v1.zip › elife_poa_e48054_Figure_2_figure_Supplement_1.png]

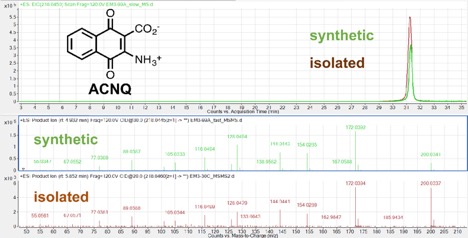

Supplement: supp [file elife-48054-supp-v1.zip › elife_poa_e48054_Figure_1_figure_supplement_2.jpg]

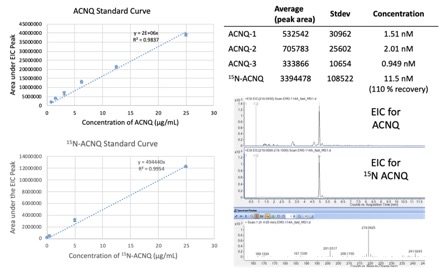

Supplement: supp [file elife-48054-supp-v1.zip › elife_poa_e48054_Figure_2_figure_Supplement_3.jpg]

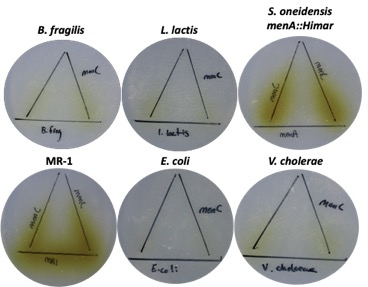

Supplement: supp [file elife-48054-supp-v1.zip › elife_poa_e48054_Figure_2_figure_Supplement_2.jpg]

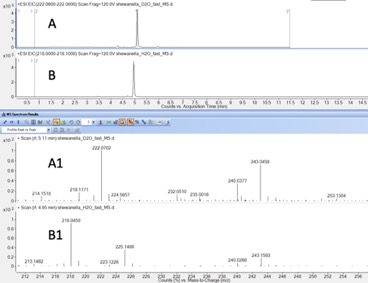

Supplement: supp [file elife-48054-supp-v1.zip › elife_poa_e48054_Figure_1_figure_Supplement_3.jpg]

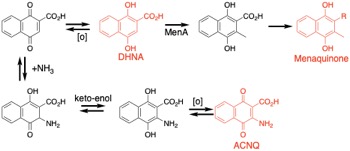

Supplement: supp [file elife-48054-supp-v1.zip › elife_poa_e48054_Figure_2_figure_Supplement_12.jpg]

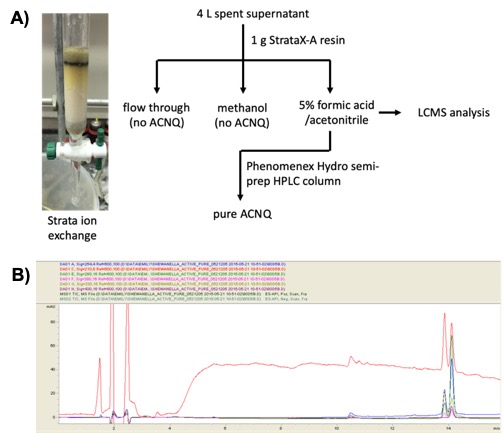

Supplement: supp [file elife-48054-supp-v1.zip › elife_poa_e48054_Figure_1_figure_supplement_1.jpg]

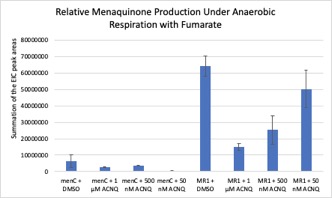

Supplement: supp [file elife-48054-supp-v1.zip › elife_poa_e48054_Figure_2_figure_Supplement_13.jpg]

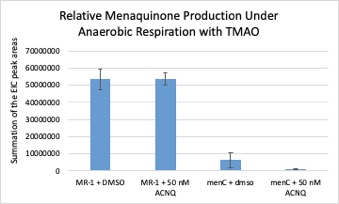

Supplement: supp [file elife-48054-supp-v1.zip › elife_poa_e48054_Figure_2_figure_Supplement_14.jpg]

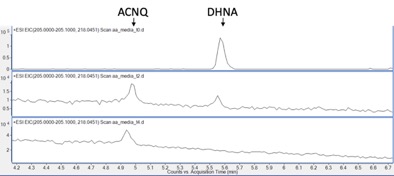

Supplement: supp [file elife-48054-supp-v1.zip › elife_poa_e48054_Figure_2_figure_Supplement_9.jpg]

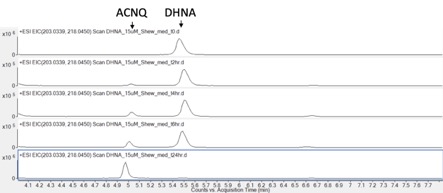

Supplement: supp [file elife-48054-supp-v1.zip › elife_poa_e48054_Figure_2_figure_Supplement_7.jpg]

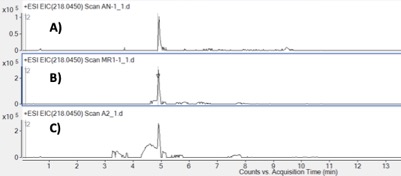

Supplement: supp [file elife-48054-supp-v1.zip › elife_poa_e48054_Figure_2_figure_Supplement_10.jpg]

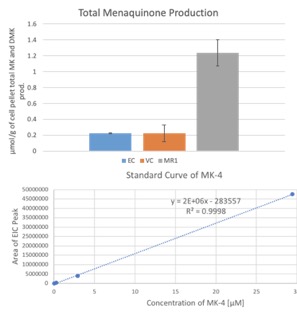

Supplement: supp [file elife-48054-supp-v1.zip › elife_poa_e48054_Figure_2_figure_Supplement_11.jpg]

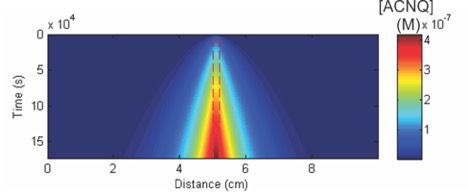

Supplement: supp [file elife-48054-supp-v1.zip › elife_poa_e48054_Figure_2_figure_Supplement_4.jpg]

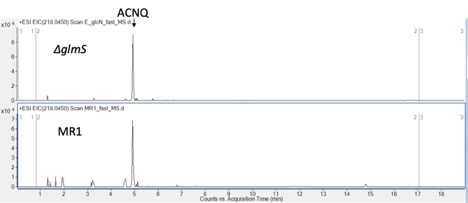

Supplement: supp [file elife-48054-supp-v1.zip › elife_poa_e48054_Figure_2_figure_Supplement_6.jpg]
